# Supplementary material for: A scenario‐drafting study to explore potential future implementation pathways of circulating tumor DNA testing in oncology
Source: PubMed Central journal article supplement (PMC11547223; doi:10.1002/1878-0261.13562), 2024-01-11
Supplement: MOL2-18-2730-s001.pdf [file MOL2-18-2730-s001.pdf]

**Supplementary table 1.** Detailed respondent characteristics.

|                                                                             | NSCLC     | CRC       | Total     |
|-----------------------------------------------------------------------------|-----------|-----------|-----------|
| <b>All</b>                                                                  | 18        | 12        | 30        |
| <b>Profession</b>                                                           |           |           |           |
| Laboratory specialist                                                       | 11        | 0         | 11        |
| Clinical researcher                                                         | 2         | 8         | 10        |
| Fundamental researcher                                                      | 1         | 3         | 4         |
| Clinical scientist in molecular pathology                                   | 3         | 0         | 3         |
| Policy maker                                                                | 1         | 0         | 1         |
| HTA-researcher/Health economist                                             | 0         | 1         | 1         |
| <b>Place of employment</b>                                                  |           |           |           |
| Academic hospital                                                           | 10        | 7         | 17        |
| Specialized cancer center                                                   | 5         | 4         | 9         |
| General hospital                                                            | 2         | 0         | 2         |
| Healthcare insurance company                                                | 1         | 0         | 1         |
| University                                                                  | 0         | 1         | 1         |
| <b>Years of experience with ctDNA (mean)</b>                                | 5.1 years | 4.4 years | 4.9 years |
| <b>Level of knowledge (No knowledge/Basic knowledge/Expert knowledge) :</b> |           |           |           |
| Monitoring treatment response                                               | (0/7/11)  | (1/6/5)   | (1/13/16) |
| Tumor profiling                                                             | (1/5/12)  | (0/8/4)   | (1/13/16) |
| Minimal residual disease detection                                          | (2/10/6)  | (1/4/7)   | (3/14/13) |
| Early detection/Screening                                                   | (3/6/9)   | (3/7/2)   | (6/13/11) |

**Supplementary table 1.** NSCLC, Non-small cell lung cancer; CRC, colorectal cancer; HTA, Health Technology Assessment; ctDNA, circulating tumor DNA.

**Supplementary table 2.** Detailed overview of the results for all scenarios.

| Scenario                                                                                                    | Specific ctDNA application          | NSCLC (n=18)                     |                       | CRC (n=12)                       |                       |
|-------------------------------------------------------------------------------------------------------------|-------------------------------------|----------------------------------|-----------------------|----------------------------------|-----------------------|
|                                                                                                             |                                     | Median likelihood (min. – max. ) | Prefer not to respond | Median likelihood (min. – max. ) | Prefer not to respond |
| <b>Successful implementation</b>                                                                            |                                     |                                  |                       |                                  |                       |
| ctDNA testing will be fully implemented                                                                     | Monitoring treatment response (MTR) | 82% (2-100%)                     | 2                     | 33.5%(0-86%)                     | 1                     |
|                                                                                                             | Tumor profiling (TP)                | 74% (13-100%)                    | 3                     | 50% (0-91%)                      | 1                     |
|                                                                                                             | MRD detection (MRD)                 | 53% (1-99%)                      | 3                     | 49% (0-92%)                      | 1                     |
|                                                                                                             | Early detection/screening (ED/S)    | 25% (0-85%)                      | 5                     | 4.5% (1-49%)                     | 1                     |
| <b>Clinical utility</b>                                                                                     |                                     |                                  |                       |                                  |                       |
| ctDNA testing will be included in clinical guidelines                                                       | Monitoring treatment response (MTR) | 86% (0-100%)                     | 2                     | 33.5% (1-100%)                   | 1                     |
|                                                                                                             | Tumor profiling (TP)                | 86% (49-100%)                    | 3                     | 53% (1-100%)                     | 1                     |
|                                                                                                             | MRD detection (MRD)                 | 56% (0-100%)                     | 3                     | 44.5% (1-95%)                    | 1                     |
|                                                                                                             | Early detection/screening (ED/S)    | 30% (0-84%)                      | 4                     | 7% (0-46%)                       | 1                     |
| <b>Economical aspects</b>                                                                                   |                                     |                                  |                       |                                  |                       |
| ctDNA testing will be reimbursed                                                                            | Monitoring treatment response (MTR) | 79% (8-100%)                     | 1                     | 39% (1-89%)                      | 1                     |
|                                                                                                             | Tumor profiling (TP)                | 95% (39-100%)                    | 2                     | 66.5% (5-99%)                    | 1                     |
|                                                                                                             | MRD detection (MRD)                 | 55% (1-100%)                     | 3                     | 63% (6-95%)                      | 1                     |
|                                                                                                             | Early detection/screening (ED/S)    | 20% (0-99%)                      | 4                     | 4.5% (0-41%)                     | 1                     |
| The primary tumor will be sequenced as part of standard of care                                             |                                     | 81% (51-100%)                    | 3                     | 72% (4-100%)                     | 1                     |
| <b>Organizational aspects</b>                                                                               |                                     |                                  |                       |                                  |                       |
| The logistics are in place so all clinicians can request ctDNA testing for their patients                   |                                     | 81% (10-100%)                    | 1                     | 67.5% (2-99%)                    | 1                     |
| Centralization of ctDNA testing in a few hospitals                                                          |                                     | 57% (23-100%)                    | 1                     | 78% (49-100%)                    | 1                     |
| <b>Technical aspects</b>                                                                                    |                                     |                                  |                       |                                  |                       |
| The pre-analytical procedures are harmonized on a national level                                            |                                     | 68% (23-100%)                    | 3                     | 40% (7-99%)                      | 2                     |
| The analytical procedures are harmonized on a national level                                                |                                     | 37% (2-79%)                      | 2                     | 48% (11-99%)                     | 2                     |
| result interpretation and reporting are harmonized on a national level                                      |                                     | 76% (22-96%)                     | 2                     | 77% (13-93%)                     | 1                     |
| another liquid biopsy biomarker will outperform ctDNA                                                       | Monitoring treatment response (MTR) | 32% (0-93%)                      | 3                     | 45% (5-100%)                     | 2                     |
|                                                                                                             | Tumor profiling (TP)                | 19% (0-55%)                      | 4                     | 20% (1-59%)                      | 2                     |
|                                                                                                             | MRD detection (MRD)                 | 28% (0-58%)                      | 4                     | 32% (10-50%)                     | 2                     |
|                                                                                                             | Early detection/screening (ED/S)    | 50% (0-58%)                      | 6                     | 50% (1-100%)                     | 1                     |
| <b>Social aspects</b>                                                                                       |                                     |                                  |                       |                                  |                       |
| A clinician will offer ctDNA testing to the patient, assuming it is included in the clinical guidelines     |                                     | 86% (31-100%)                    | 2                     | 85.5% (25-100%)                  | 1                     |
| A clinician will offer ctDNA testing to the patient, assuming it is not included in the clinical guidelines |                                     | 49% (5-74%)                      | 2                     | 19% (1-93%)                      | 1                     |

**Supplementary table 2.** NSCLC, Non-small cell lung cancer; CRC, colorectal cancer; ctDNA, circulating tumor DNA.

**Supplementary table 3.** Expectation about obtaining survival benefit as a result of ctDNA testing.

| <b>Survival benefit</b>     | <b>NSCLC</b> | <b>CRC</b> |
|-----------------------------|--------------|------------|
| Monitor treatment response  | 71%          | 27%        |
| Target profiling            | 59%          | 45%        |
| MRD detection               | 65%          | 82%        |
| Early detection / screening | 53%          | 18%        |
| None of them                | 6%           | 0%         |
| Prefer not to respond       | 6%           | 0%         |

**Supplementary table 3.** Answers to question 19: Based on your knowledge and opinion, in which application(s) will ctDNA testing potentially improve survival of the patients significantly? Results indicate the percentage of experts considering that ctDNA testing will potentially improve survival of the patients significantly. NSCLC, Non-small cell lung cancer; CRC, colorectal cancer.

**Supplementary table 4.** Aspects different to survival benefit leading to inclusion of ctDNA testing in clinical guidelines

| <b>Other clinical benefits</b>                                       | <b>NSCLC</b> | <b>CRC</b> |
|----------------------------------------------------------------------|--------------|------------|
| Unmet clinical need                                                  | 59%          | 18%        |
| High burden of tissue biopsy methods (liquid biopsies less invasive) | 100%         | 73%        |
| High concordance with current diagnostics                            | 41%          | 45%        |
| Improvement of Quality of life                                       | 47%          | 45%        |
| Other                                                                | 18%          | 36%        |

**Supplementary table 4.** Results to question 20: Results indicate the percentage of experts considering that that aspect could lead to inclusion of ctDNA testing in clinical guidelines. NSCLC, Non-small cell lung cancer; CRC, colorectal cancer

**Supplementary table 5.** Ensuring patient access.

| Theme                                | Answer                                                               |
|--------------------------------------|----------------------------------------------------------------------|
| Economical                           | Reimbursement                                                        |
| Social                               | Education to physicians                                              |
| Social                               | Communication                                                        |
| Organizational                       | (Use of) existing logistics                                          |
| Organizational                       | ctDNA testing considered standard of care/included in the guidelines |
| <b>Total number of responses: 50</b> |                                                                      |

**Supplementary table 5.** Answers to question 34: “Based on your knowledge and opinion, how can we ensure that every patient has access to ctDNA testing?”. Answers were coded and classified in themes. Answers are presented by code, and classified in themes. In total 30 experts were exposed to this question, results from NSCLC and CRC experts are presented together. Only answers provided by more than 10% of the respondents are included in the table. Color code: Green: >50% of the respondents report this advantage/disadvantage. Orange: >25% of the respondents report this advantage/disadvantage. Yellow: >10% report this advantage/disadvantage.

**Supplementary table 6.** Main advantages and disadvantages of centralization.

| Advantages                                                           | Disadvantages                                           |
|----------------------------------------------------------------------|---------------------------------------------------------|
| Cost reduction                                                       | Logistics                                               |
| Increased expertise                                                  | Turnaround time increased                               |
| Scale efficiencies                                                   | Risk that the expertise would be limited to few centers |
| Quality                                                              |                                                         |
| Uniform analysis and reporting                                       |                                                         |
| Turnaround time reduced                                              |                                                         |
| Large cohorts will promote an increase of innovation and development |                                                         |
| <b>Total number of advantages mentioned: 66</b>                      | <b>Total number of disadvantages mentioned: 33</b>      |

**Supplementary table 6.** Answers to question 31: “Based on your knowledge and opinion, what would be the main advantage and disadvantage of centralizing the ctDNA testing in few hospitals?”. Answers are presented by code for NSCLC and CRC together, in total 30 experts were exposed to this question. Only answers provided by more than 10% of the respondents are included in the table. Color code: Green: >50% of the respondents report this advantage/disadvantage. Orange: >25% of the respondents report this advantage/disadvantage. Yellow: >10% report this advantage/disadvantage.
